# Supplementary material for: In Vitro Evaluation of Acrylic Adhesives in Lymphatic Fluids-Influence of Glue Type and Procedural Parameters
Source: MDPI journal article supplement (doi:10.3390/biomedicines10051195), 2022-05-21
Supplement: s1 [file s1]

**Table S1.** Results of laboratory examinations of the employed lymphatic samples.

|                            | Triglycerides<br>(mg/dL) | Total<br>Protein<br>(g/L) | Leukocytes<br>(/μL) | Erythrocytes<br>(/μL) | Sodium<br>(mmol/L) | Potassium<br>(mmol/L) | Calcium<br>(mmol/L) | Chloride<br>(mmol/L) |
|----------------------------|--------------------------|---------------------------|---------------------|-----------------------|--------------------|-----------------------|---------------------|----------------------|
| <b>Lymphatic<br/>fluid</b> | 13                       | 21                        | 579                 | < 1,000               | 147                | 4.25                  | 1.61                | 111                  |
| <b>Chylous<br/>fluid</b>   | 1,111                    | 7                         | 3                   | 1,000                 | 146                | 4.5                   | 1.25                | 113                  |

**Table S2.** Static embolization times.

| Glue/Lipiodol | Histoacryl<br>Low TG<br>(in sec)<br>A | Histoacryl<br>High TG<br>(in sec)<br>B | Glubran II<br>Low TG<br>(in sec)<br>C | Glubran II<br>High TG<br>(in sec)<br>D |
|---------------|---------------------------------------|----------------------------------------|---------------------------------------|----------------------------------------|
| <b>1:0</b>    | 9.3 ± 0.6                             | 10.1 ± 0.5                             | 29.3 ± 1.5                            | 52 ± 3.6                               |
| <b>1:1</b>    | 20.3 ± 1.5                            | 28.3 ± 2.5                             | 51 ± 3                                | 66 ± 2                                 |
| <b>1:2</b>    | 81.3 ± 3.5                            | 91.3 ± 3.5                             | 71 ± 2                                | 83 ± 4.6                               |
| <b>1:3</b>    | 241.3 ± 10                            | 374 ± 12.5                             | 123.3 ± 4.1                           | 143.3 ± 7                              |
| <b>1:4</b>    | 465.3 ± 4.5                           | 1517 ± 60.8                            | 215.3 ± 5.5                           | 235.3 ± 5                              |
| <b>1:5</b>    | 782 ± 7.5                             | 3867 ± 100.7                           | 302.7 ± 7.8                           | 606 ± 8.2                              |
| <b>1:6</b>    | 2210.7 ± 49.1                         | 5270 ± 140                             | 718.3 ± 10.4                          | 1506.7 ± 23                            |
| <b>1:7</b>    | 4096.7 ± 110.6                        | 9770 ± 218                             | 2363.3 ± 56.9                         | 5580.3 ± 39.5                          |

Polymerization times in seconds for Histoacryl (HA) and Glubran 2 (GL) mixed with iodized oil (ratios 1:0 to 1:7) in low triglyceride fluid (low TG; <50mg/dL) and high triglyceride fluid (high TG; >600 mg/dL).

**Table S3.** Intergroup comparison static embolization.

| Ratio            |                           |            |            |            |            |            |            |
|------------------|---------------------------|------------|------------|------------|------------|------------|------------|
| Glue/Iodized Oil | Kruskal Wallis Test       | A vs. B    | A vs. C    | A vs. D    | B vs. C    | B vs. D    | C vs. D    |
| 1:0              | H(3) = 9.7. $p = 0.021$   | ns         | $p < 0.05$ |
| 1:1              | H(3) = 10.4 $p = 0.0156$  | $p < 0.05$ |
| 1:2              | H(3) = 9.2. $p = 0.027$   | $p < 0.05$ | $p < 0.05$ | ns         | $p < 0.05$ | $p < 0.05$ | $p < 0.05$ |
| 1:3              | H(3) = 10.4. $p = 0.0156$ | $p < 0.05$ |
| 1:4              | H(3) = 10.4. $p = 0.0156$ | $p < 0.05$ |
| 1:5              | H(3) = 10.4. $p = 0.0156$ | $p < 0.05$ |
| 1:6              | H(3) = 10.4. $p = 0.0156$ | $p < 0.05$ |
| 1:7              | H(3) = 10.4. $p = 0.0156$ | $p < 0.05$ |

Inter-group comparison of total polymerization times for HA and GL in iodized oil using the Kruskal Wallis test (one way analysis of variance) and the Conover test (post-hoc analysis). A: Histoacryl in lymph; B: Histoacryl in chyle; C: Glubran II in lymph; D: Glubran II in chyle.
